# Supplementary material
Source: PubMed Central journal article supplement (PMC5949147)

A

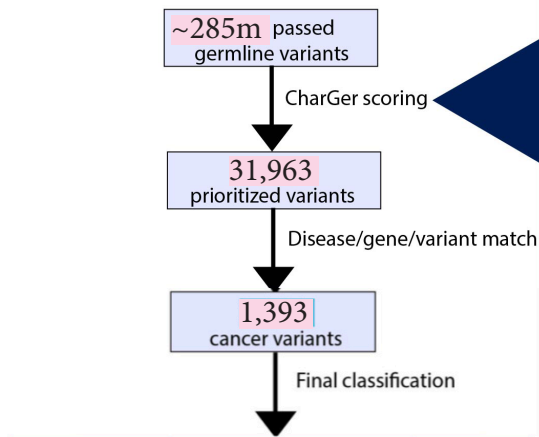

| Classification    | Evidence                                      | Variant count |
|-------------------|-----------------------------------------------|---------------|
| Pathogenic        | Known pathogenic in ClinVar/curated databases | 435           |
| Likely Pathogenic | CharGer score > 8                             | 418           |
| Prioritized VUS   | CharGer score > 4                             | 540           |

| Module Name | Description                                                                                                                         | Database/tools                                                   | Points |
|-------------|-------------------------------------------------------------------------------------------------------------------------------------|------------------------------------------------------------------|--------|
| PVS1        | Truncations in susceptibility genes where LOF is a known mechanism and harbor variants with a dominant mode of inheritance.         | 152 cancer predisposition genes                                  | 8      |
| PS1         | Same peptide change as a previously established pathogenic variant.                                                                 | ClinVar/compiled gene-specific databases                         | 7      |
| PSC1        | Truncations in susceptibility genes where LOF is a known mechanism and harbor variants with a recessive mode of inheritance.        | 152 cancer predisposition genes                                  | 4      |
| PMC1        | Truncations when no susceptibility gene list provided                                                                               | None                                                             | 2      |
| PM1         | Variants located in a somatic mutation hotspot as determined by HotSpot3D clustering analysis of TCGA (MC3).                        | TCGA/HotSpot3D                                                   | 2      |
| PM2         | Absent or extremely low frequency in the general population (MAF < 0.0005).                                                         | ExAC                                                             | 2      |
| PM4         | Protein length changes due to inframe indels or nonstop variant of genes that harbor variants with a dominant mode of inheritance.  | 152 cancer predisposition genes                                  | 2      |
| PM5         | Different peptide change of a pathogenic variant at the same amino acid residue.                                                    | ClinVar/compiled gene-specific databases                         | 2      |
| PP2         | Missense variant in the susceptibility genes.                                                                                       | 152 cancer predisposition genes                                  | 1      |
| PP3         | Multiple lines (>1) of in silico evidence of deleterious effect.                                                                    | SIFT/PolyPhen/Biosum62/Compara/VEP/Impact/MaxEntScan/GeneSplicer | 1      |
| PPC1        | Protein length changes due to inframe indels or nonstop variant of genes that harbor variants with a recessive mode of inheritance. | 152 cancer predisposition genes                                  | 1      |
| PPC2        | Protein length changes due to inframe indels or nonstop variant when no susceptibility gene list provided                           | None                                                             | 1      |
| BP4         | Multiple lines (>1) of in silico evidence of none deleterious effect.                                                               | SIFT/PolyPhen/Biosum62/Compara/VEP/Impact/MaxEntScan/GeneSplicer | -1     |
| BMC1        | Peptide change is at the same location of a known benign change                                                                     | ClinVar/compiled gene-specific databases                         | -2     |
| BSC1        | Peptide change is known to be benign                                                                                                | ClinVar/compiled gene-specific databases                         | -6     |
| BA1         | High allele frequency in the general population (MAF > 0.05).                                                                       | ExAC                                                             | -8     |

B

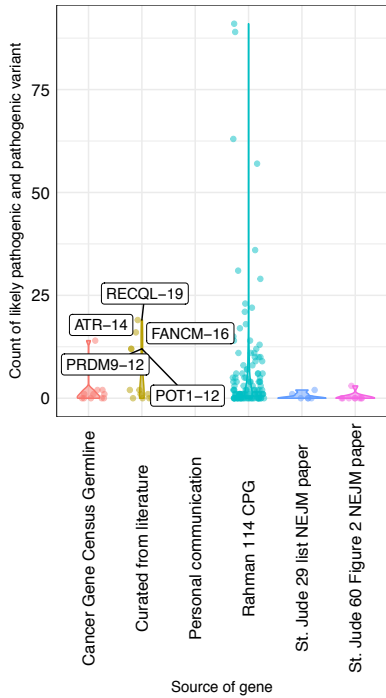

C

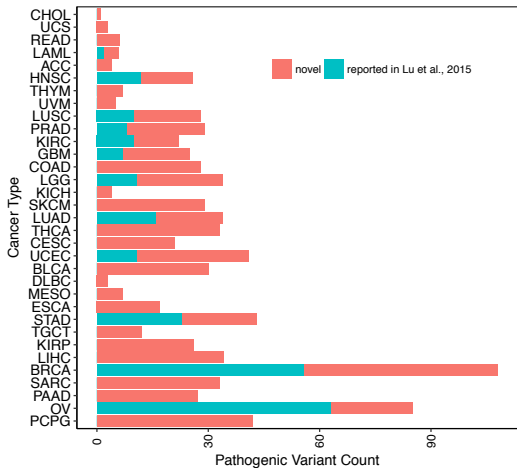

D

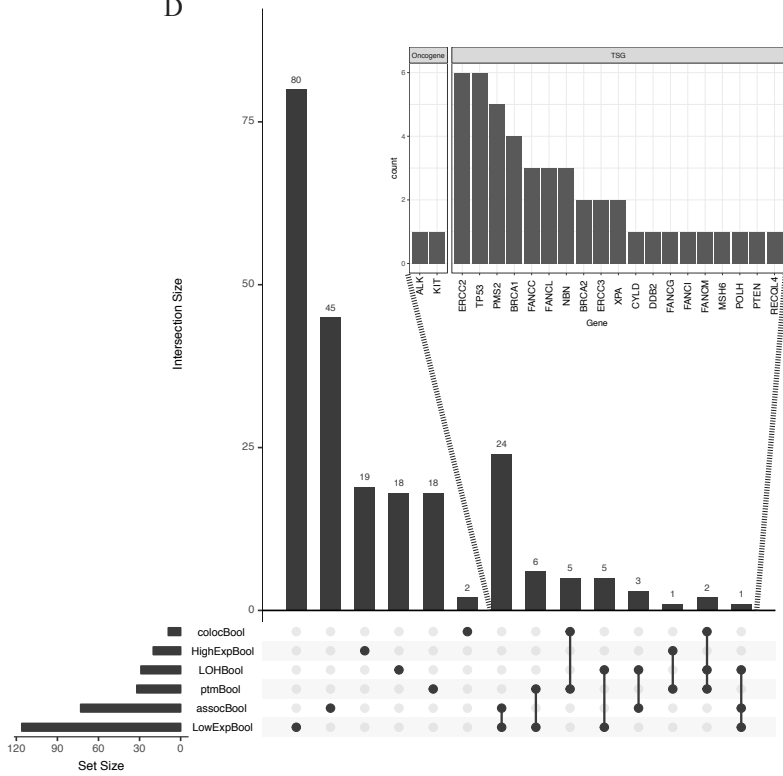

Supplement: NIHMS957308-supplement-9.pdf [file NIHMS957308-supplement-9.pdf]
