# Supplementary material
Source: PubMed Central journal article supplement (PMC5949147)

A

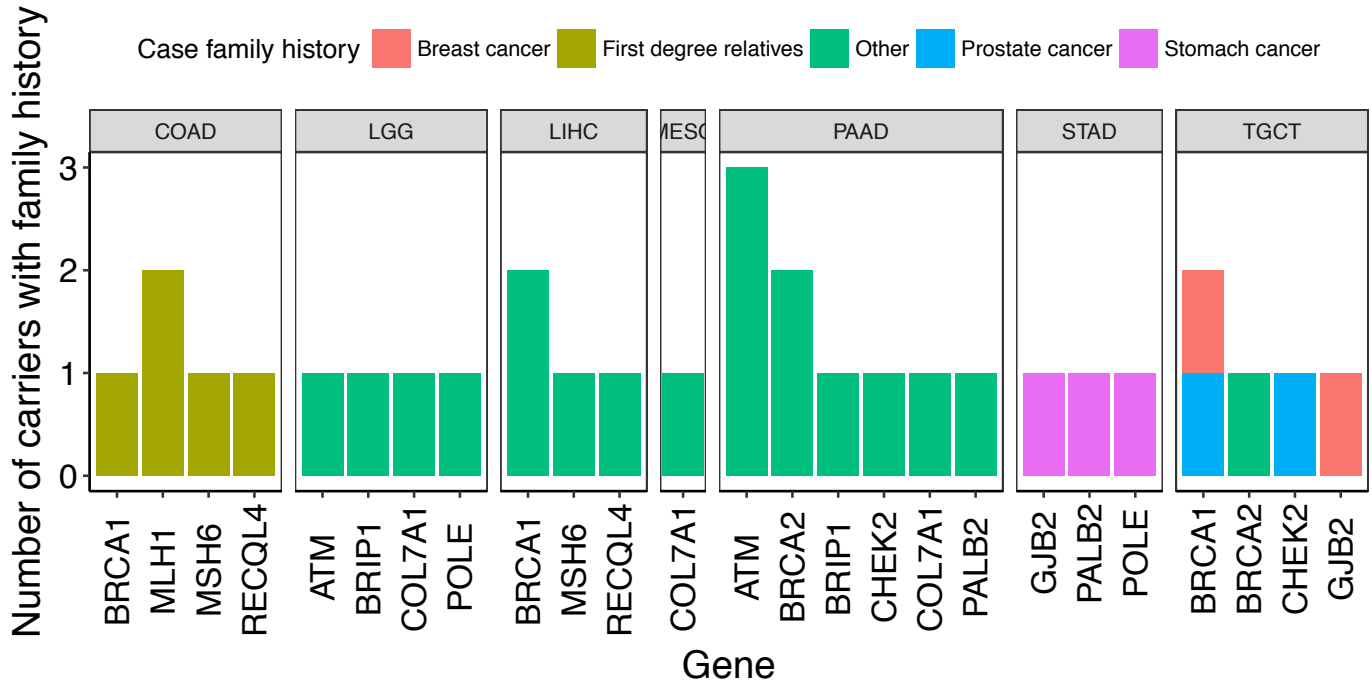

B

burden analysis power: collapsing 10 mutations on average  
variants are rare, meaning MAF around 0.05%

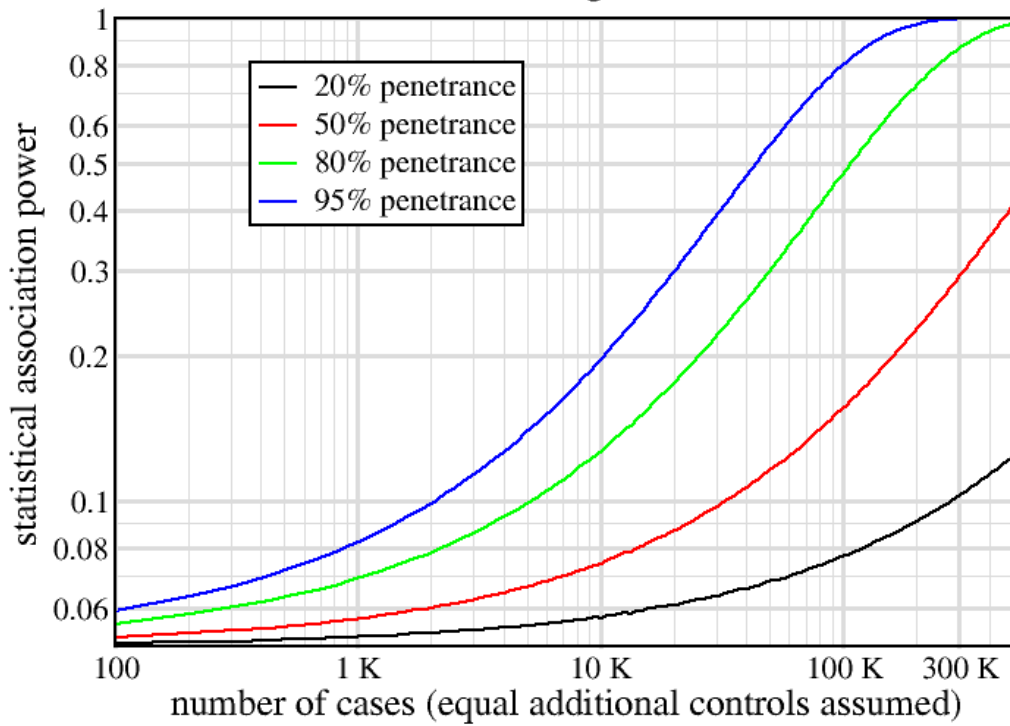

Supplement: NIHMS957308-supplement-14.pdf [file NIHMS957308-supplement-14.pdf]
