# Supplementary material
Source: PubMed Central journal article supplement (PMC5949147)

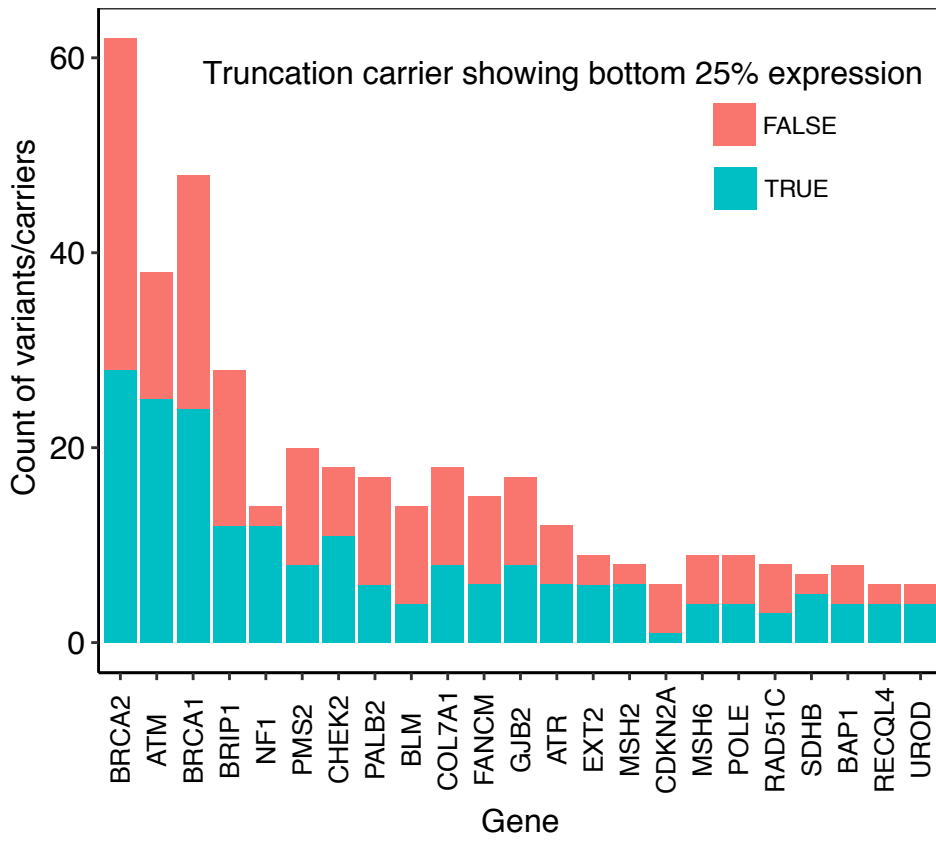

Supplement: NIHMS957308-supplement-11.pdf [file NIHMS957308-supplement-11.pdf]

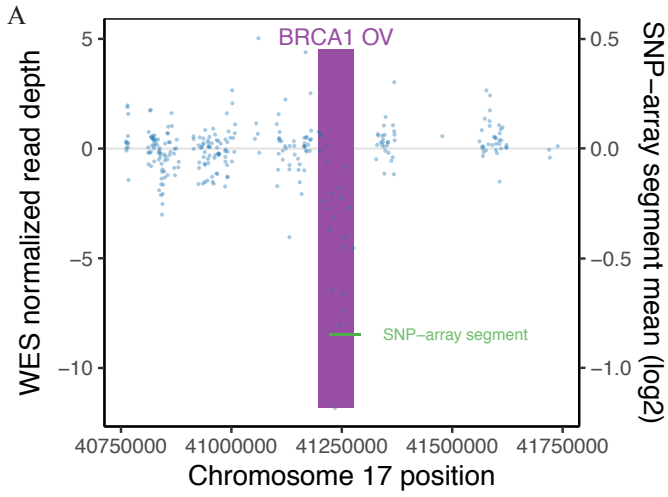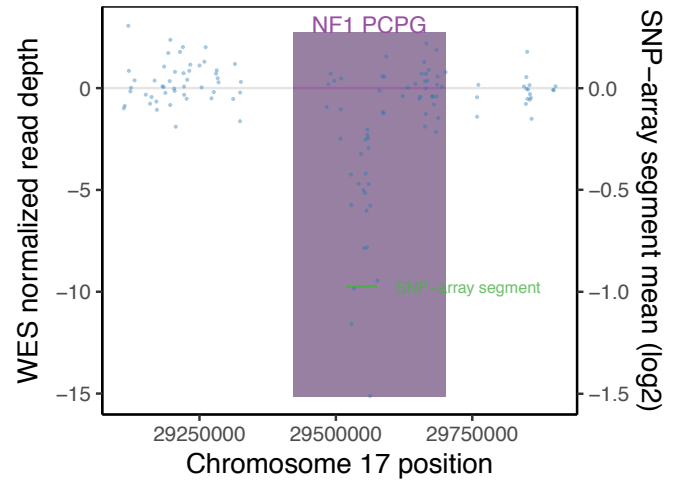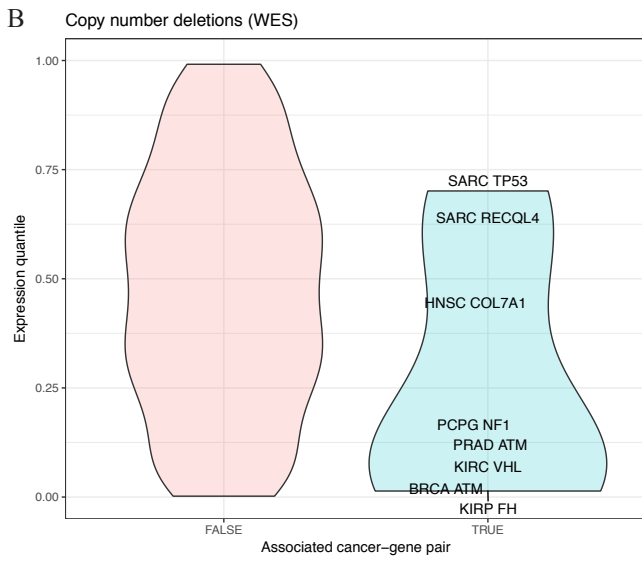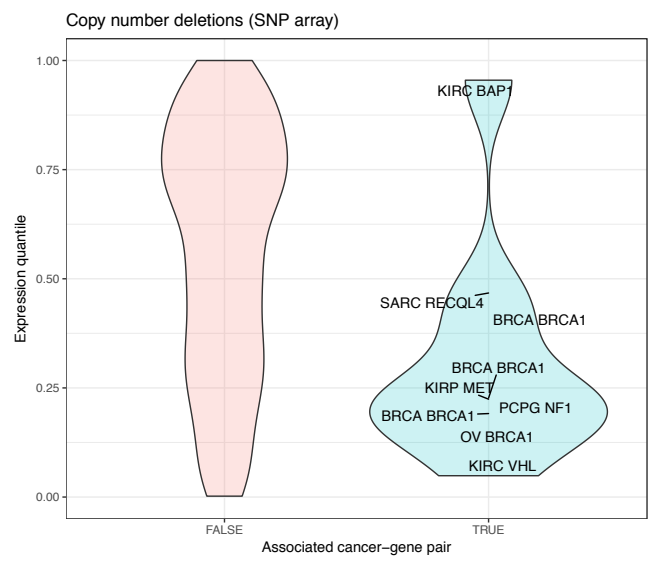

Supplement: NIHMS957308-supplement-12.pdf [file NIHMS957308-supplement-12.pdf]

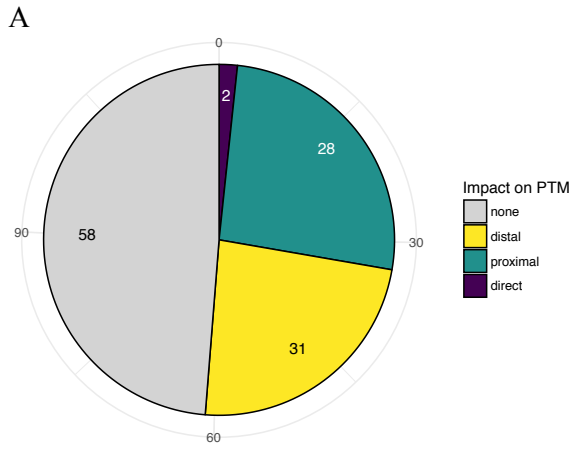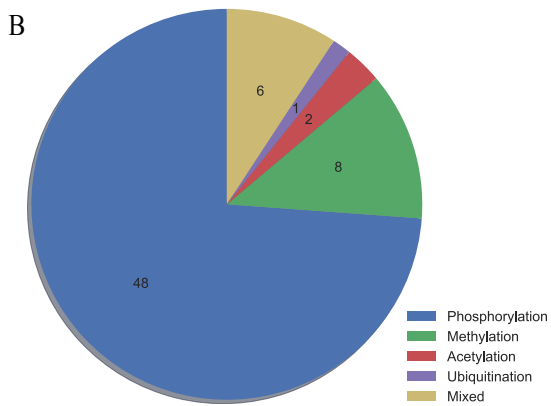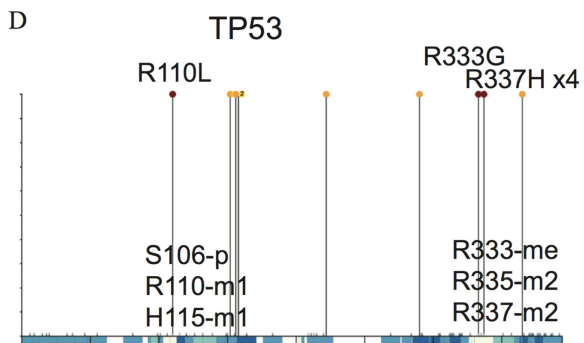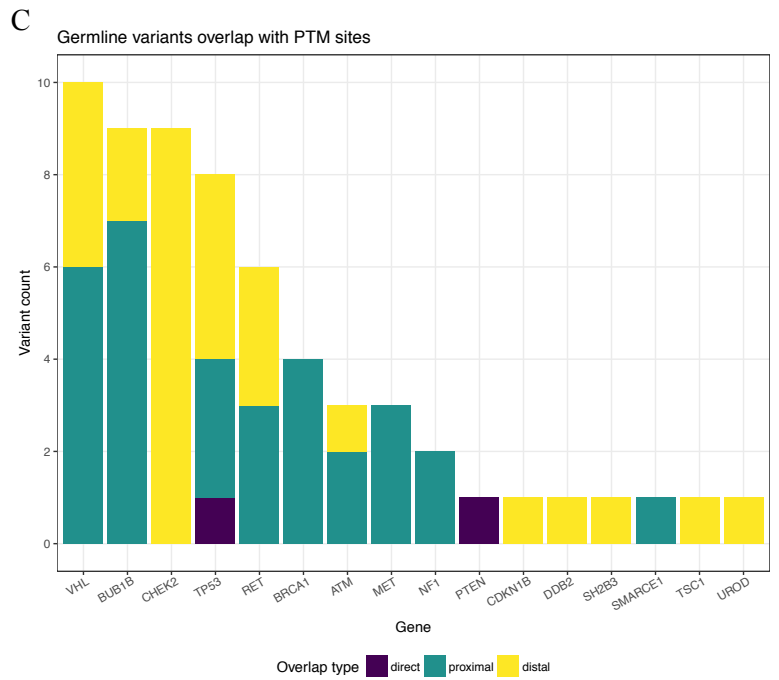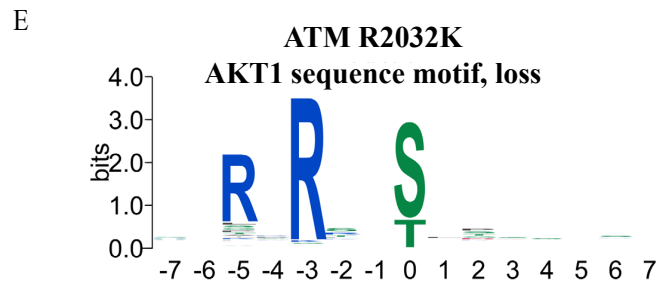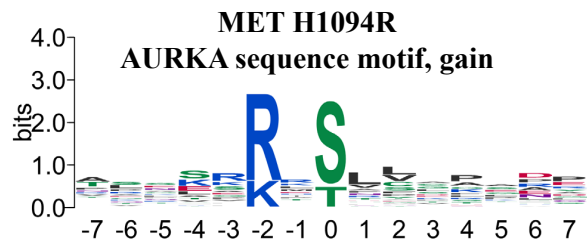

Supplement: NIHMS957308-supplement-13.pdf [file NIHMS957308-supplement-13.pdf]

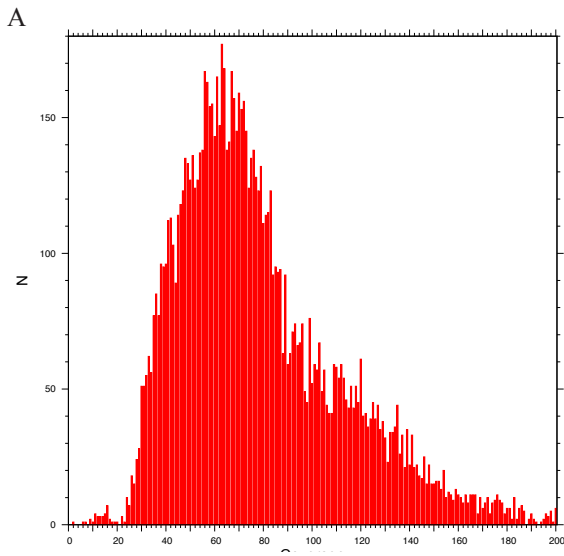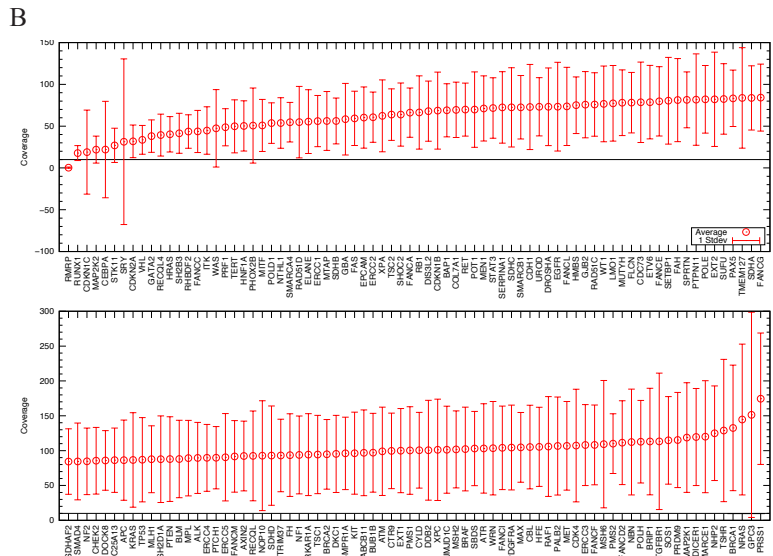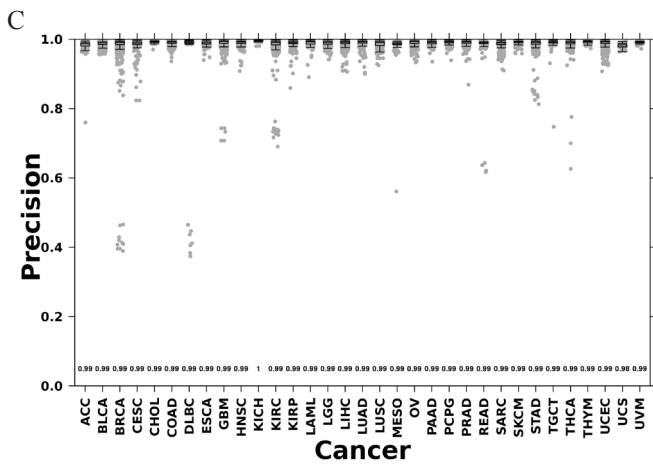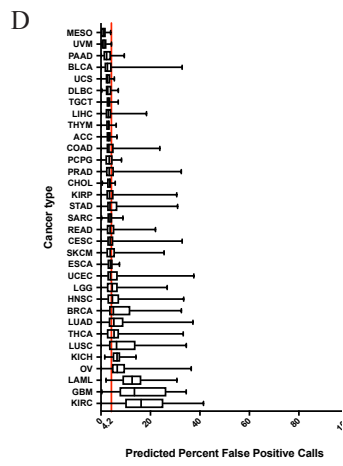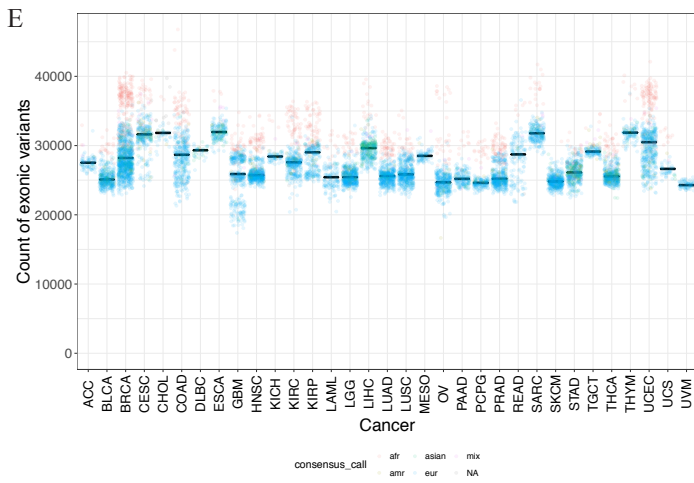

Supplement: NIHMS957308-supplement-8.pdf [file NIHMS957308-supplement-8.pdf]
